# Supplementary material for: The Effects of Physiotherapy in the Treatment of Cubital Tunnel Syndrome: A Systematic Review
Source: MDPI journal article supplement (doi:10.3390/jcm11144247), 2022-07-21
Supplement: s1 [file s1]

## Search strategy

#1 cubital tunnel syndrome  
#2 cubital tunnel  
#3 ulnar nerve  
#4 ulnar neuropathy  
#5 entrapment neuropathy  
#6 Ulnar Nerve Compression Syndromes cubital tunnel syndrome[MeSH Terms]  
#7 Ulnar Nerve Compression Syndromes[MeSH Terms]  
#8 #1 OR #2 OR #3 OR #4 OR #5 OR #6 OR #7  
#9 physiotherapy  
#10 physical therapy  
#11 manual therapy  
#12 joint manipulation  
#13 joint mobilisation  
#14 neurodynamic techniques  
#15 neurodynamic mobilization  
#16 neural mobilization  
#17 nerve-gliding techniques  
#18 nerve mobilization  
#19 exercises  
#20 electrotherapy  
#21 electrophysiological modalities  
#22 magnetotherapy  
#23 dry needling  
#24 laser therapy  
#25 ultrasound  
#26 cryotherapy  
#27 cold therapy  
#28 shock wave therapy  
#29 #9 OR #10 OR #11 OR #12 OR #13 OR #14 OR #15 OR #16 OR #17 OR #18 OR #19 OR  
#20 OR #21 OR #22 OR #23 OR #24 OR #25 OR #26 OR #27 OR #28  
#30 case study  
#31 case report  
#32 placebo  
#33 sham  
#34 randomized control trial  
#35 randomised control trial  
#36 randomized clinical trial  
#37 randomised clinical trial)  
#38 #30 OR #31 OR #32 OR #33 OR #34 OR #35 OR #36 OR #37  
#39 nerve conduction study  
#40 electrodiagnostic test

#41 sensory threshold  
#42 sensation test  
#43 two-point discrimination  
#44 cutaneous pressure threshold  
#45 vibration sensation  
#46 muscle strength  
#47 grip strength  
#48 pinch strength  
#49 pain measurement  
#50 the numeric pain rating scale  
#51 visual analogue scale  
#52 functional tests  
#53 patient-specific functional scale  
#54 global rating of change  
#55 northwick park questionnaire  
#56 disability of arm shoulder  
#57 hand index  
#58 phalen's test  
#59 tinel's sign  
#60 froment sign  
#61 elbow flexion test  
#62 ulnar nerve provocation test  
#63 nerve provocation test  
#64 range of motion  
#65 upper limb neurodynamic test  
#66 electromyography  
**#67** #39 OR #40 OR #41 OR #42 OR #43 OR #44 OR #45 OR #46 OR #47 OR #48 OR #49  
OR #50 OR #51 OR #52 OR #53 OR #54 OR #55 OR #56 OR #57 OR #58 OR #59 OR #60  
OR #61 OR #62 OR #63 OR #64 OR #65 OR #66  
#68 #8 AND #29 AND #38 AND #67
